# Supplementary material for: Adverse events in patients with return emergency department visits
Source: PubMed Central journal article supplement — BMJ Qual Saf. 2014 Dec 24;24(2):142–8. doi: 10.1136/bmjqs-2014-003194 (PMC4316869; doi:10.1136/bmjqs-2014-003194), 2014-12-24
Supplement: bmjqs-2014-003194-s1.pdf [file bmjqs-2014-003194-s1.pdf]

**Appendix A: Association between 53 Adverse Events and those without Adverse Events for Patient and Index ED Visit Characteristics**

|                                       |                     | <b>Not an<br/>Adverse Event<br/>N=13,442</b> | <b>Adverse<br/>Event<br/>N=53</b> | <b>TOTAL<br/>N=13,495</b> | <b>P-<br/>VALUE</b> |
|---------------------------------------|---------------------|----------------------------------------------|-----------------------------------|---------------------------|---------------------|
| <b>Patient Characteristics</b>        |                     |                                              |                                   |                           |                     |
| Age (Median (IQR))                    |                     | 47 (31-65)                                   | 54 (34-73)                        | 47 (31-65)                | 0.05                |
| Sex                                   | Female              | 7,099 (52.8%)                                | 25 (47.2%)                        | 7,124 (52.8%)             | 0.41                |
| Inpatient /ED Visit last 6 mos        |                     | 5,217 (38.8%)                                | 29 (54.7%)                        | 5,246 (38.9%)             | 0.02*               |
| Previous inpatient last 6 mos         | Mean ± SD           | 0.2 ± 0.6                                    | 0.4 ± 0.7                         | 0.2 ± 0.6                 | 0.01*               |
|                                       | 0                   | 11,800 (87.8%)                               | 38 (71.7%)                        | 11,838 (87.7%)            | <.001*              |
|                                       | 1                   | 1,155 (8.6%)                                 | 10 (18.9%)                        | 1,165 (8.6%)              |                     |
|                                       | 2                   | 320 (2.4%)                                   | 5 (9.4%)                          | 325 (2.4%)                |                     |
| Previous ED Visit last 6 mos          | Mean ± SD           | 0.9 ± 2.3                                    | 1.9 ± 4.7                         | 0.9 ± 2.3                 | 0.002*              |
|                                       | 0                   | 8,523 (63.4%)                                | 29 (54.7%)                        | 8,552 (63.4%)             | 0.23                |
|                                       | 1                   | 2,500 (18.6%)                                | 11 (20.8%)                        | 2,511 (18.6%)             |                     |
|                                       | 2                   | 1,040 (7.7%)                                 | 6 (11.3%)                         | 1,046 (7.8%)              |                     |
| CTAS**                                | 1-3                 | 10,729 (79.8%)                               | 45 (84.9%)                        | 10,774 (79.8%)            | 0.22                |
|                                       | 4-5                 | 2,713 (20.2%)                                | 8 (15.1%)                         | 2,721 (20.3%)             |                     |
| <b>Index ED Visit Characteristics</b> |                     |                                              |                                   |                           |                     |
| Campus                                | Civic Campus        | 6,778 (50.4%)                                | 26 (49.1%)                        | 6,804 (50.4%)             | 0.84                |
|                                       | General Campus      | 6,664 (49.6%)                                | 27 (50.9%)                        | 6,691 (49.6%)             |                     |
| Arrive by Ambulance                   |                     | 3,474 (25.8%)                                | 15 (28.3%)                        | 3,489 (25.9%)             | 0.68                |
| Any Radiology during ED visit†        |                     | 5,826 (43.3%)                                | 34 (64.2%)                        | 5,860 (43.4%)             | 0.002*              |
| Abdomen or Pelvis Imaging             |                     | 1,339 (10.0%)                                | 10 (18.9%)                        | 1,349 (10.0%)             | 0.03*               |
| CT Abdomen & Pelvis                   |                     | 669 (5.0%)                                   | 1 (1.9%)                          | 670 (5.0%)                | 0.30                |
| CT Chest                              |                     | 231 (1.7%)                                   | 1 (1.9%)                          | 232 (1.7%)                | 0.93                |
| CT Head                               |                     | 1,160 (8.6%)                                 | 7 (13.2%)                         | 1,167 (8.6%)              | 0.24                |
| Ultrasound Abdomen                    |                     | 374 (2.8%)                                   | 5 (9.4%)                          | 379 (2.8%)                | 0.003*              |
| Ultrasound Pelvis                     |                     | 104 (0.8%)                                   | 1 (1.9%)                          | 105 (0.8%)                | 0.36                |
| X-ray Abdomen                         |                     | 479 (3.6%)                                   | 4 (7.5%)                          | 483 (3.6%)                | 0.12                |
| X-ray Chest                           |                     | 2,765 (20.6%)                                | 15 (28.3%)                        | 2,780 (20.6%)             | 0.17                |
| X-ray Musculoskeletal                 |                     | 1,838 (13.7%)                                | 7 (13.2%)                         | 1,845 (13.7%)             | 0.92                |
| Consult requested                     |                     | 3,744 (27.9%)                                | 15 (28.3%)                        | 3,759 (27.9%)             | 0.94                |
| ED Disposition Home/Residence         |                     | 10,569 (78.6%)                               | 47 (88.7%)                        | 10,616 (78.7%)            | 0.08                |
| Arrival                               | Day (0800-1559)     | 6,461 (48.1%)                                | 35 (66.0%)                        | 6,496 (48.1%)             | 0.01*               |
| Time of day                           | Evening (1600-2359) | 5,026 (37.4%)                                | 16 (30.2%)                        | 5,042 (37.4%)             |                     |
|                                       | Night (0000-0759)   | 1,955 (14.5%)                                | 2 (3.8%)                          | 1,957 (14.5%)             |                     |

\*Statistically significant

\*\*CTAS: Canadian Triage and Acuity Scale

† Radiology includes: chest x-ray, abdominal x-ray, x-rays of extremities, CT head, CT chest, CT abdomen & pelvis, Ultrasound abdomen & pelvis

**Appendix B: Association between 53 Adverse Events and those without Adverse Events who Returned to the ED, Patient and Index ED Visit Characteristics**

|                                                                    |                        | <b>Not an<br/>Adverse Event<br/>N=870</b> | <b>Adverse<br/>Event<br/>N=53</b> | <b>TOTAL<br/>N=923</b> | <b>P-<br/>VALUE</b> |
|--------------------------------------------------------------------|------------------------|-------------------------------------------|-----------------------------------|------------------------|---------------------|
| <b>Patient Characteristics</b>                                     |                        |                                           |                                   |                        |                     |
| Age at arrival                                                     | Median (IQR)           | 48 (32-67)                                | 54 (34-73)                        | 49 (32-67)             | 0.08                |
| Female                                                             |                        | 431 (49.5%)                               | 25 (47.2%)                        | 456 (49.4%)            | 0.74                |
| Inpatient /ED Visit last 6 mos                                     |                        | 511 (58.7%)                               | 29 (54.7%)                        | 540 (58.5%)            | 0.56                |
| Previous inpatient last 6 mos                                      | Mean ± SD              | 0.32 ± 0.77                               | 0.38 ± 0.66                       | 0.32 ± 0.77            | 0.59                |
|                                                                    | 0                      | 698 (80.2%)                               | 38 (71.7%)                        | 736 (79.7%)            | 0.12                |
|                                                                    | 1                      | 107 (12.3%)                               | 10 (18.9%)                        | 117 (12.7%)            |                     |
|                                                                    | 2                      | 41 (4.7%)                                 | 5 (9.4%)                          | 46 (5.0%)              |                     |
| Previous ED Visit last 6 mos                                       | Mean ± SD              | 2.69 ± 4.98                               | 1.94 ± 4.69                       | 2.65 ± 4.97            | 0.29                |
|                                                                    | 0                      | 376 (43.2%)                               | 29 (54.7%)                        | 405 (43.9%)            | 0.43                |
|                                                                    | 1                      | 153 (17.6%)                               | 11 (20.8%)                        | 164 (17.8%)            |                     |
|                                                                    | 2                      | 103 (11.8%)                               | 6 (11.3%)                         | 109 (11.8%)            |                     |
| CTAS                                                               | 1-3                    | 735 (84.5%)                               | 45 (84.9%)                        | 780 (84.5%)            | 0.44                |
|                                                                    | 4-5                    | 135 (15.5%)                               | 8 (15.1%)                         | 143 (15.5%)            |                     |
| <b>Index ED Visit Characteristics</b>                              |                        |                                           |                                   |                        |                     |
| Campus                                                             | Civic Campus           | 435 (50.0%)                               | 26 (49.1%)                        | 461 (49.9%)            | 0.89                |
|                                                                    | General Campus         | 435 (50.0%)                               | 27 (50.9%)                        | 462 (50.1%)            |                     |
| Arrive by Ambulance                                                |                        | 272 (31.3%)                               | 15 (28.3%)                        | 287 (31.1%)            | 0.65                |
| Any Radiology during ED visit                                      |                        | 326 (37.5%)                               | 34 (64.2%)                        | 360 (39.0%)            | <.001*              |
| Abdomen or Pelvis Imaging                                          |                        | 91 (10.5%)                                | 10 (18.9%)                        | 101 (10.9%)            | 0.06                |
| CT Abdomen & Pelvis                                                |                        | 38 (4.4%)                                 | 1 (1.9%)                          | 39 (4.2%)              | 0.38                |
| CT Chest                                                           |                        | 15 (1.7%)                                 | 1 (1.9%)                          | 16 (1.7%)              | 0.93                |
| CT Head                                                            |                        | 78 (9.0%)                                 | 7 (13.2%)                         | 85 (9.2%)              | 0.30                |
| Ultrasound Abdomen                                                 |                        | 23 (2.6%)                                 | 5 (9.4%)                          | 28 (3.0%)              | 0.005*              |
| Ultrasound Pelvis                                                  |                        | 8 (0.9%)                                  | 1 (1.9%)                          | 9 (1.0%)               | 0.49                |
| X-ray Abdomen                                                      |                        | 34 (3.9%)                                 | 4 (7.5%)                          | 38 (4.1%)              | 0.20                |
| X-ray Chest                                                        |                        | 146 (16.8%)                               | 15 (28.3%)                        | 161 (17.4%)            | 0.03                |
| X-ray Musculoskeletal                                              |                        | 82 (9.4%)                                 | 7 (13.2%)                         | 89 (9.6%)              | 0.37                |
| Consult requested                                                  |                        | 232 (26.7%)                               | 15 (28.3%)                        | 247 (26.8%)            | 0.79                |
| Arrival Time of day                                                | Day (0800 to 1559)     | 365 (42.0%)                               | 35 (66.0%)                        | 400 (43.3%)            | 0.001*              |
|                                                                    | Evening (1600 to 2359) | 348 (40.0%)                               | 16 (30.2%)                        | 364 (39.4%)            |                     |
|                                                                    | Night (0000 to 0759)   | 157 (18.0%)                               | 2 (3.8%)                          | 159 (17.2%)            |                     |
| Index ED visit not admitted, return within 72h, admitted at return |                        | 111 (12.8%)                               | 15 (28.3%)                        | 126 (13.7%)            | 0.001               |

\*Statistically significant
